# Supplementary material for: Modeling the Dynamic Concentration Profiles and Efficacy of Type-I and Type-II Photopolymerization
Source: Preprints.org preprint supplement (doi:10.20944/preprints201805.0472.v2), 2018-10-30
Supplement: Supplementary file 1 [file supplementary]

Supporting Information (for Figs. S-1 to S-5).

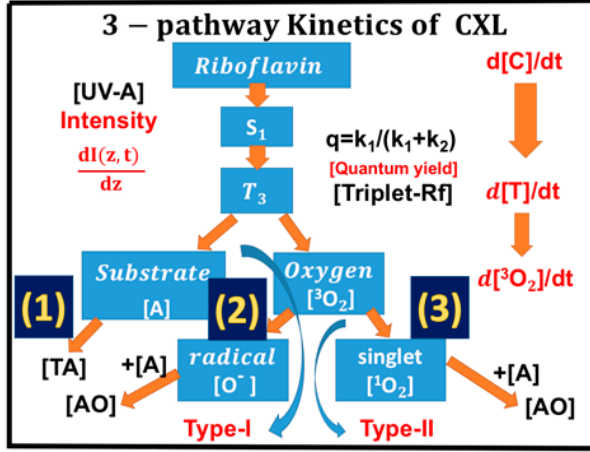

Fig. S-1 The kinetics of PDT showing both type-I and type-II pathways for UVA and riboflavin initiated corneal crosslinking [17].

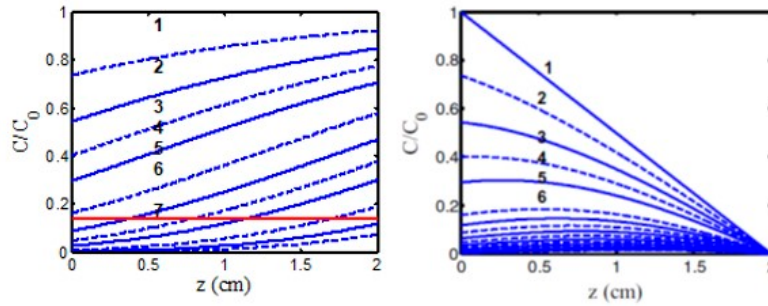

Fig. S-2 The normalized photoinitiator concentration profiles (for type-I) for uniform (left figure) and non-uniform (right figure, with  $D=1.0$  cm) PS initial distribution, for  $t=0$  (curves 1) and  $t=50, 100, 150, 200, 300, 350$  seconds (curves 2 to 7) with quantum yield  $q=1.0$ ,  $a'=0.2(\text{mM}\cdot\text{cm})^{-1}$ ,  $b'=0.15 (\text{mM}\cdot\text{cm})^{-1}$ , and  $Q=0.1 (1/\text{cm})$  [26,28].

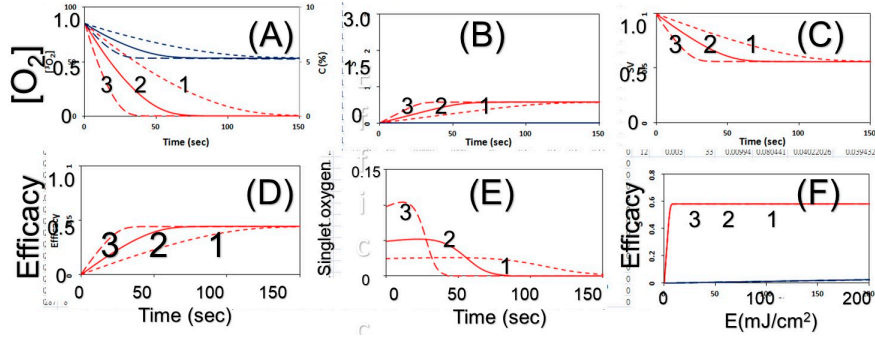

Fig. S-3 Same as Fig. 4, but for a higher  $[A]=100 \text{ uM}$ , having a lower efficacy.

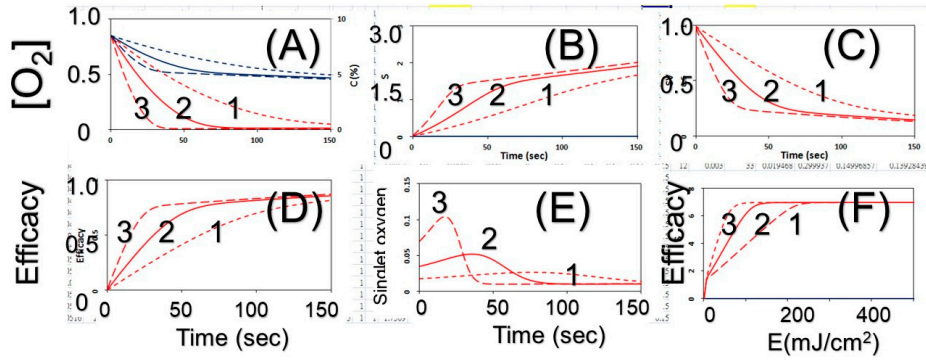

Fig. S-4 Same as Fig. 4, but for  $p=0.15 \text{ (1/s)}$ , with external oxygen source.

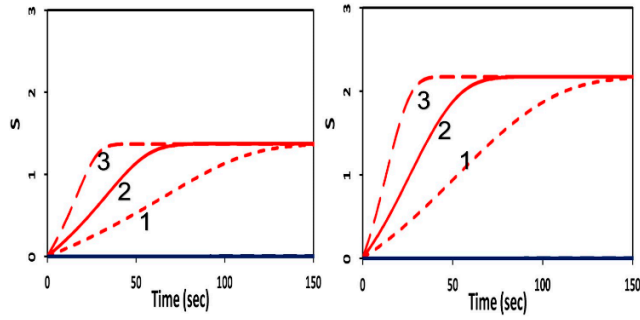

Fig. S-5 The effect of substrate concentration,  $[A] = 100 \text{ uM}$  (left curve) and  $50 \text{ uM}$  (right curve), for  $I_0 = (50, 100, 200) \text{ mW/cm}^2$ , and  $p=0$ .

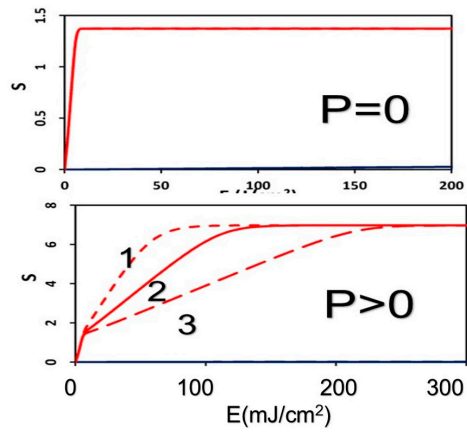

**Fig. S-6** Comparison of type-II S-profiles for the cases of  $p=0$  (without oxygen source term), and  $p=0.15$  (1/s) (with external oxygen).
